# Supplementary material
Source: PubMed Central journal article supplement (PMC4075158)
Supplement: me-14-1134.pdf [file me-14-1134.pdf]

## **Supplementary Figure Legend**

### **Supplemental Figure 1. Acute IPMK depletion attenuates LKB1-AMPK signaling in response to AMPK agonists.**

(A-B) WT (fl/fl) MEF cells were transfected with Cre recombinase or control empty vector for 30 h to acutely delete IPMK from cells. Cells were treated with 4 mM metformin (C), 1 mM AICAR (D) for 2 h.

### **Supplemental Figure 2. IPMK is involved in phosphorylation of LKB1 at Ser 428.**

Cells (fl/fl and KO) were treated with 4 mM Metformin for 2 hour. Cell lysates were analyzed for pAMPK and pACC. Blots are representative of at least three separate experiments. Blots are representative of at least three separate experiments.

### **Supplemental Figure 3. IPMK is not required for CaMKK $\beta$ -mediated phosphorylation of AMPK.**

Cells (fl/fl and KO) were treated with calcium ionophore, A23187 for 1 hour. Cell lysates were analyzed for pAMPK and pACC. Blots are representative of at least three separate experiments.

### **Supplemental Figure 4. Expression of various species of IPMK restores AMPK signaling in IPMK-depleted (KO) MEFs cells.**

Cells were transfected (electroporation) with 30 ug of Myc-tagged wild-type IPMK, atlpk2 $\beta$  (Arabidopsis)

or control empty vector for 30 h. Cells were treated with 1mM AICAR for 2 h. Western blot performed for Supplemental fig.1 Blots are representative of at least three separate experiments. Relative quantifications of pAMPK $\alpha$ 2 levels are shown. Values are normalized by total levels of AMPK  $\alpha$ 2 and are expressed as means  $\pm$  SE of three determinations (\* Student's t-test,  $P < 0.005$ ). (C) IPMK-depleted, wild-type, and at1pk2 $\beta$  overexpressed cells were radiolabeled with [ $^3$ H]inositol as described material and methods. Soluble inositol phosphates (labeled IP4, IP5, IP6, and IP7) were separated by HPLC.

**Supplemental Figure 5. Exon3 and 6 of Human IPMK are involved in LKB1 interaction.** (A) GST, GST-IPMK or GST-IPMK exon fragments (exon1: 1-62, exon2: 63-92, exon3: 93-124, exon4: 125-182, exon5: 183-208 and exon6: 209-416) were pull-downed from HEK293T cells co-transfected with LKB1-Myc. Co-immunoprecipitation of LKB1-Myc was determined by western blots.

**Supplemental Figure 6. IPMK does not alter an interaction between LKB1 and AMPK.** HEK293 T cells were transfected as indicated in the figure. GST pulldown assay was performed and visualized by immunoblotting.

**Supplemental Figure 7. IPMK activity does not alter its interaction with LKB1.** HEK293T cells were transfected with either wild type (W) or inactive (K) IPMK plasmid in the presence or absence of LKB1 plasmid. Immunoprecipitation

was performed with anti-flag antibody and immunoblotted with either Myc or flag antibody.

**Supplemental Figure 8. Overexpression of LKB1 (1-90) does not alter the profile of inositol phosphates.** HEK293T cells transfected with GFP or LKB1 (1-90) were radiolabeled with [<sup>3</sup>H]inositol as described in Supplemental Experimental procedures. Soluble inositol phosphates (labeled IP4, IP5, IP6, and IP7) were separated by HPLC. No major difference between two groups suggests that LKB1 (1-90) does not affect IPMK function in inositol metabolism.

**A**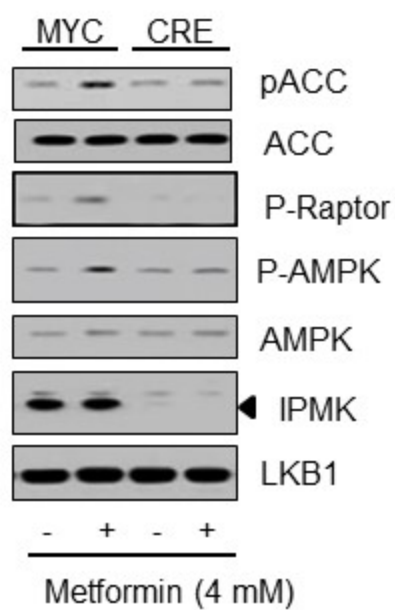**B**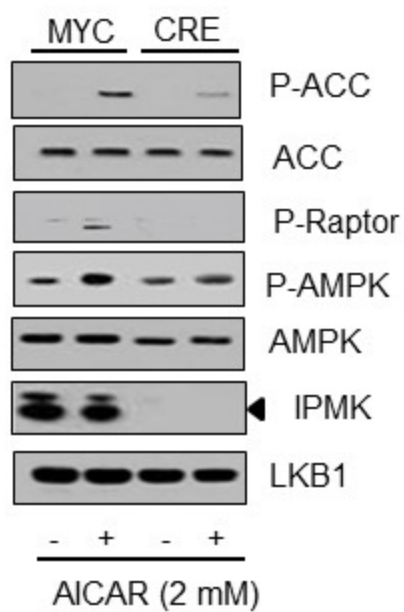

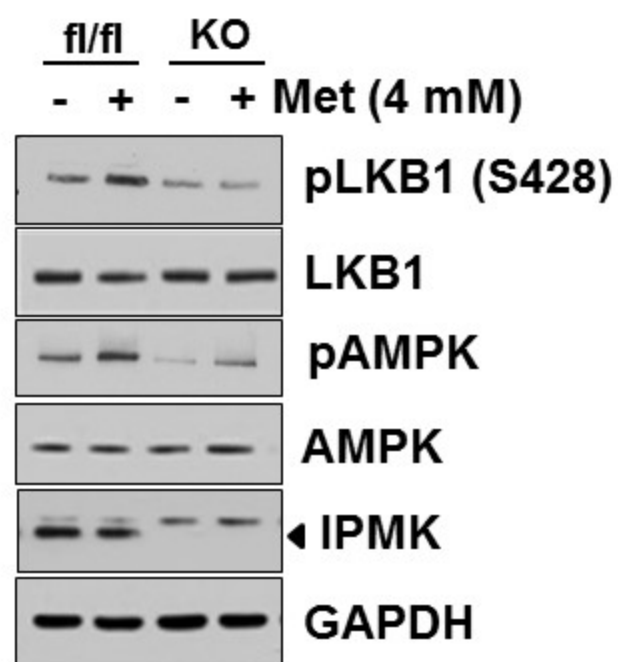

Supplemental Figure 2 (Bang et al)

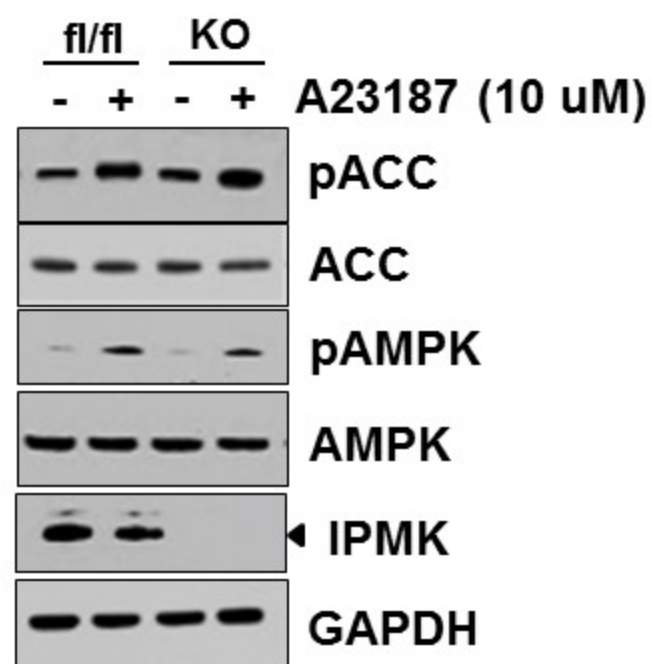

Supplemental Figure 3 (Bang et al)

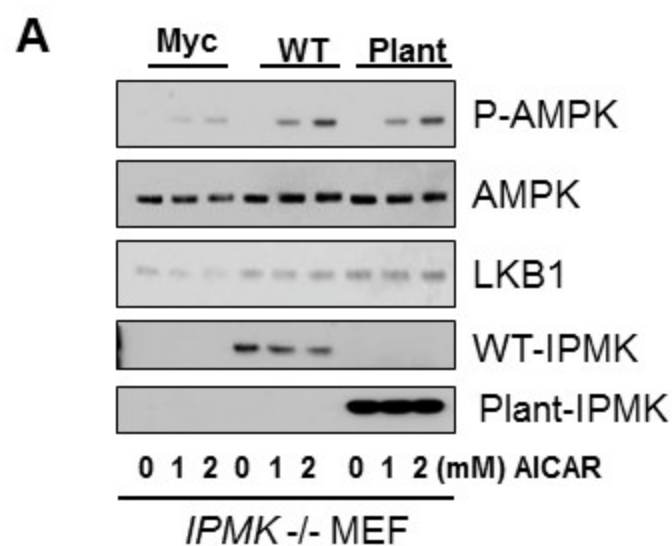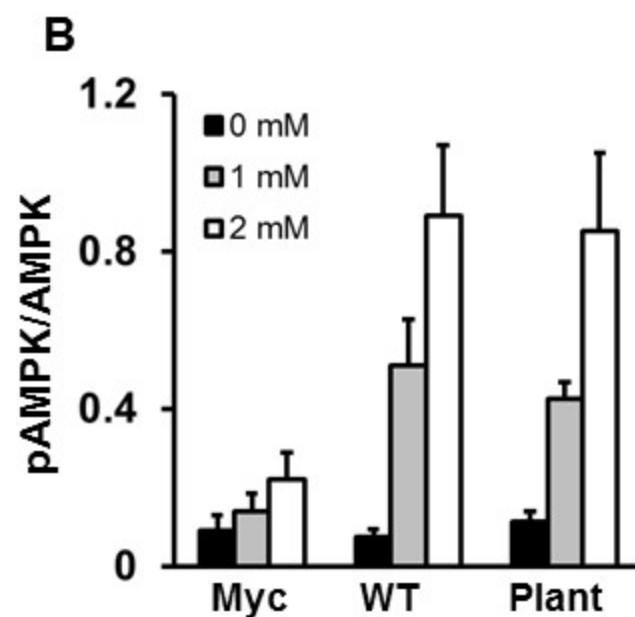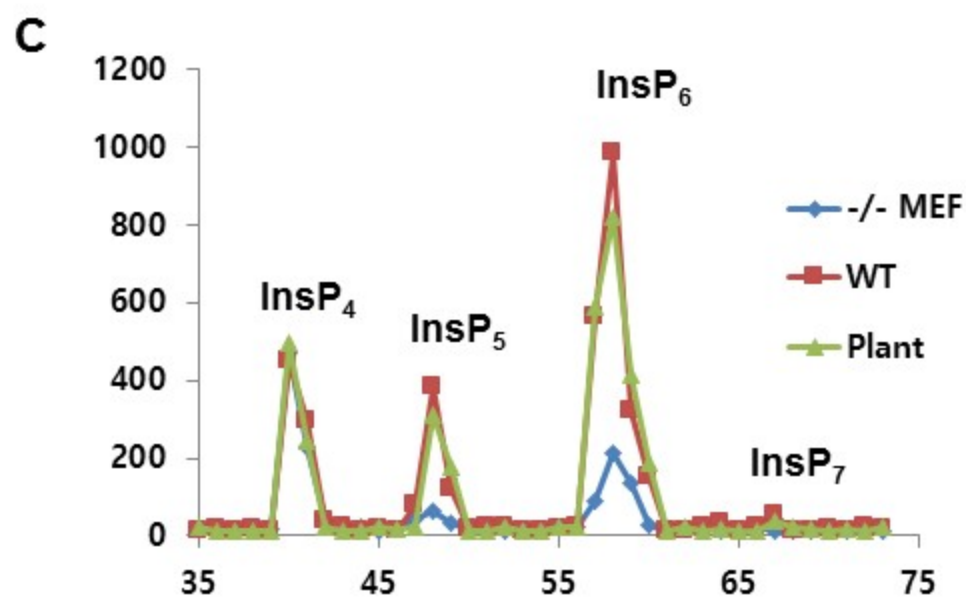

Supplemental Figure 4 (Bang et al)

# Interaction of IPMK and LKB1

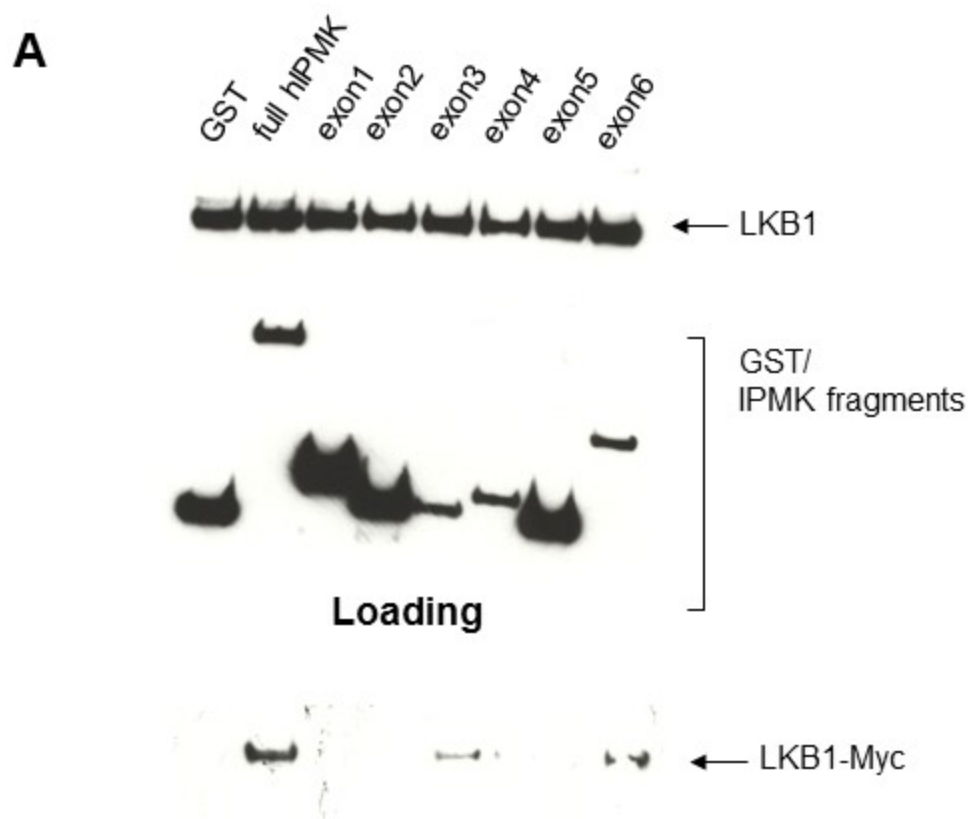



**A**

|          |   |   |   |   |   |
|----------|---|---|---|---|---|
| GST      | + | + | - | - | - |
| GST-AMPK | - | - | + | + | + |
| LKB-flag | - | + | - | + | + |
| IPMK-myc | + | - | + | - | + |

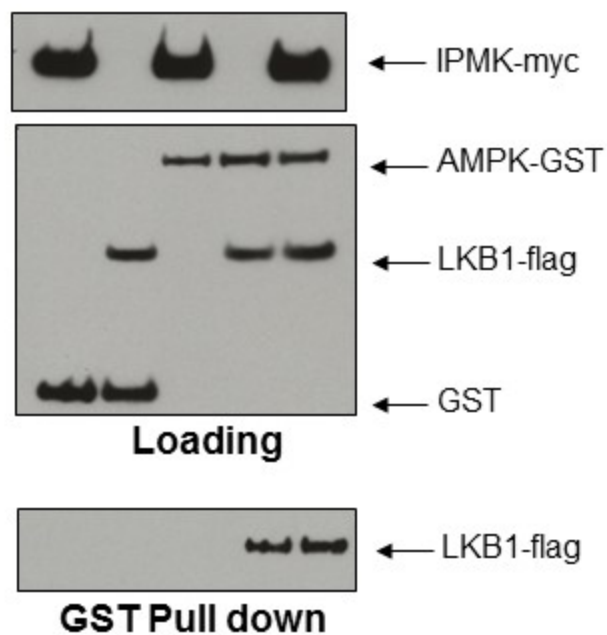

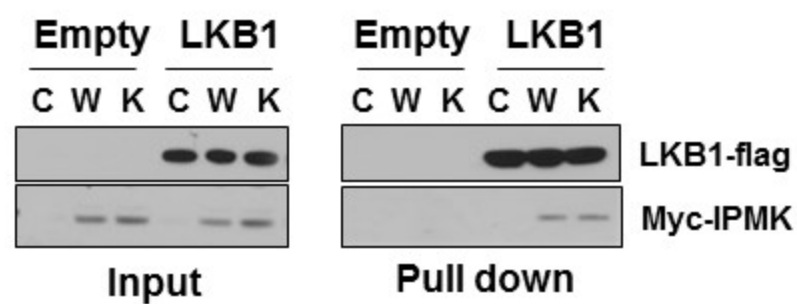

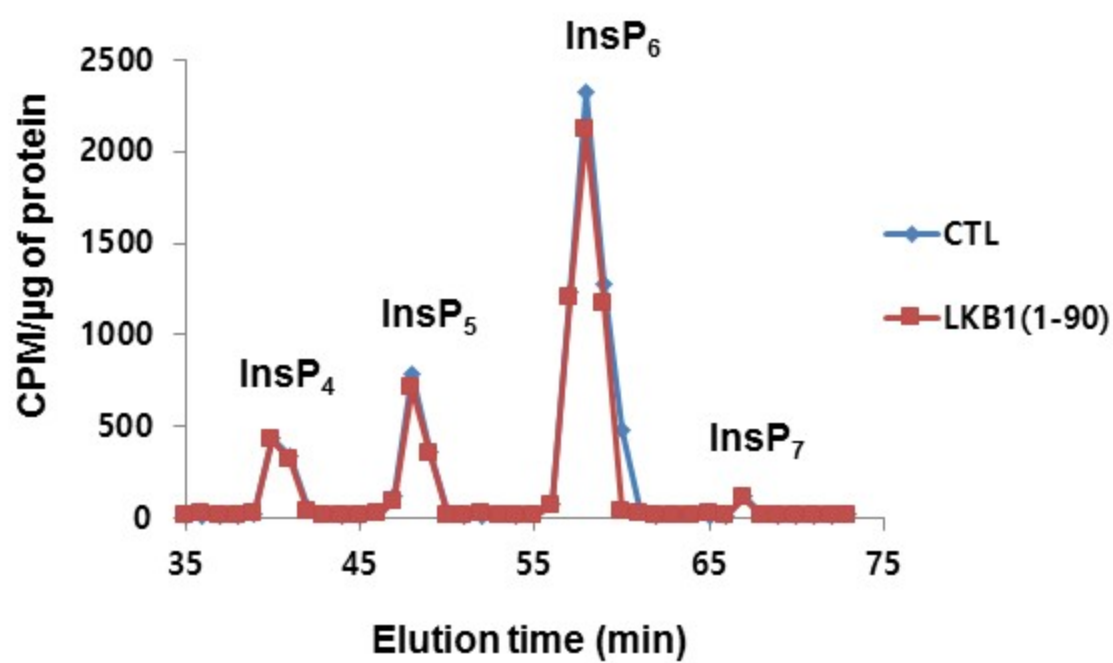

Supplemental Figure 8 (Bang et al)
